# Supplementary material for: The trade-off of Vibrio parahaemolyticus between bacteriophage resistance and growth competitiveness
Source: Front Microbiol. 2024 Jun 11;15:1346251. doi: 10.3389/fmicb.2024.1346251 (PMC11196418; doi:10.3389/fmicb.2024.1346251)
Supplement: Supplementary file 4 [file Data_Sheet_4.xlsx]

## Sheet: Sheet1
S5. Lysis of Vibrio parahaemolyticus strains by vibriophage vB_VpaS_PGB
Time	2216E	2216E	2216E	VP	VP	VP	VPB-1	VPB-1	VPB-1	VPB-2	VPB-2	VPB-2	VPB-3	VPB-3	VPB-3	VPB-4	VPB-4	VPB-4
0	0.0744	0.0737	0.0743	0.0784	0.0749	0.0732	0.0818	0.0743	0.0784	0.0751	0.09	0.0864	0.0776	0.0822	0.0875	0.0783	0.0793	0.0832
10	0.0739	0.0737	0.0742	0.0789	0.0742	0.0722	0.0757	0.0739	0.0729	0.0747	0.0812	0.0721	0.0734	0.0745	0.0739	0.0772	0.0752	0.0763
20	0.074	0.0734	0.0739	0.0787	0.0741	0.072	0.0757	0.074	0.0729	0.0749	0.0812	0.0721	0.0735	0.0746	0.0739	0.0771	0.0752	0.0761
30	0.074	0.0735	0.074	0.0788	0.0742	0.0718	0.0757	0.0738	0.0729	0.0746	0.0812	0.072	0.0734	0.0742	0.0736	0.077	0.0751	0.076
40	0.074	0.0733	0.074	0.0786	0.0741	0.0717	0.0757	0.0738	0.0729	0.0749	0.0811	0.072	0.0735	0.0745	0.0737	0.0769	0.0748	0.0758
50	0.074	0.0733	0.074	0.0789	0.0743	0.0721	0.0757	0.0737	0.0729	0.0747	0.0809	0.0719	0.0737	0.0745	0.0738	0.0771	0.075	0.076
60	0.0737	0.0733	0.0741	0.0787	0.0741	0.0721	0.0757	0.0737	0.0729	0.0753	0.081	0.0719	0.0734	0.0743	0.0739	0.077	0.0751	0.0761
70	0.074	0.0731	0.0739	0.0787	0.0742	0.072	0.0757	0.0739	0.0729	0.075	0.081	0.072	0.0735	0.0745	0.0739	0.0769	0.0751	0.0759
80	0.0739	0.0732	0.074	0.079	0.074	0.0721	0.0758	0.0738	0.0729	0.0751	0.0809	0.0719	0.0736	0.0744	0.0737	0.077	0.0752	0.076
90	0.0739	0.0733	0.0741	0.0786	0.0742	0.0721	0.0758	0.0739	0.073	0.075	0.0809	0.072	0.0735	0.0745	0.0737	0.0769	0.0751	0.0759
100	0.0739	0.0732	0.0739	0.0788	0.0741	0.0721	0.0759	0.0738	0.0731	0.075	0.0809	0.072	0.0736	0.0745	0.0738	0.077	0.0753	0.076
110	0.0739	0.0731	0.074	0.0787	0.0741	0.0719	0.0757	0.0738	0.0728	0.075	0.081	0.072	0.0735	0.0743	0.0737	0.0767	0.075	0.0758
120	0.0739	0.0731	0.0739	0.079	0.0743	0.0722	0.0758	0.0739	0.0729	0.0752	0.0811	0.0721	0.0737	0.0746	0.0737	0.0769	0.0752	0.076
130	0.0739	0.0732	0.0739	0.0789	0.0743	0.0723	0.0759	0.074	0.0731	0.0752	0.081	0.0722	0.0738	0.0746	0.0738	0.0771	0.0753	0.0759
140	0.0738	0.0732	0.074	0.0793	0.0746	0.0726	0.0764	0.0742	0.0734	0.0755	0.0813	0.0723	0.0739	0.0748	0.0741	0.0771	0.0753	0.076
150	0.0739	0.073	0.0738	0.0793	0.0751	0.0727	0.0766	0.0744	0.0736	0.0756	0.0815	0.0725	0.0739	0.0747	0.074	0.0769	0.0752	0.076
160	0.0738	0.0731	0.074	0.0801	0.0755	0.0734	0.077	0.075	0.074	0.0758	0.0817	0.0728	0.0739	0.0749	0.0741	0.0768	0.0753	0.0759
170	0.0739	0.0732	0.074	0.0807	0.0763	0.0741	0.0776	0.0755	0.0745	0.0765	0.0825	0.0735	0.0742	0.0752	0.0743	0.0769	0.0753	0.0759
180	0.0739	0.0733	0.0742	0.0818	0.0775	0.0755	0.0788	0.0765	0.0756	0.0772	0.0833	0.0742	0.0743	0.0754	0.0745	0.0771	0.0754	0.0761
190	0.0739	0.0733	0.0743	0.0833	0.0793	0.0775	0.0806	0.078	0.0771	0.0784	0.0847	0.0754	0.0746	0.0755	0.0746	0.0772	0.0755	0.0761
200	0.0738	0.0732	0.0742	0.0857	0.0821	0.0804	0.0832	0.0804	0.0794	0.0801	0.0866	0.0773	0.0751	0.0759	0.0752	0.0771	0.0755	0.076
210	0.0738	0.0732	0.0742	0.0895	0.0863	0.0856	0.0873	0.084	0.0832	0.083	0.0896	0.0801	0.0755	0.0763	0.0753	0.0771	0.0756	0.0761
220	0.0739	0.0733	0.0743	0.0958	0.0932	0.0929	0.0936	0.0897	0.0889	0.0874	0.0949	0.0848	0.0761	0.0768	0.0759	0.0773	0.0755	0.0761
230	0.0738	0.0732	0.0743	0.1048	0.1034	0.1045	0.1033	0.0984	0.0975	0.0942	0.102	0.0916	0.0771	0.0775	0.0767	0.0773	0.0756	0.0762
240	0.074	0.0733	0.0743	0.1186	0.1191	0.122	0.1184	0.1117	0.1105	0.104	0.113	0.1015	0.0781	0.0785	0.0774	0.0771	0.0756	0.0761
250	0.074	0.0733	0.0742	0.1373	0.1414	0.1503	0.1384	0.1309	0.1295	0.119	0.1283	0.116	0.0795	0.0796	0.0787	0.0773	0.0757	0.0761
260	0.074	0.0733	0.0742	0.1701	0.1846	0.1793	0.1734	0.1609	0.1584	0.1397	0.1482	0.1353	0.0812	0.0811	0.0798	0.0772	0.0755	0.076
270	0.0739	0.0733	0.0742	0.184	0.2018	0.2008	0.2004	0.1974	0.1961	0.1689	0.178	0.1625	0.0834	0.0831	0.0818	0.0774	0.0758	0.0763
280	0.074	0.0733	0.0742	0.2035	0.2244	0.2354	0.2294	0.221	0.2211	0.1998	0.1959	0.1866	0.086	0.0851	0.0842	0.0776	0.0758	0.0764
290	0.0738	0.0733	0.0741	0.2366	0.2479	0.2672	0.2462	0.2379	0.2372	0.2231	0.2177	0.2119	0.0886	0.0874	0.086	0.0775	0.0758	0.0764
300	0.0739	0.0735	0.074	0.2605	0.2582	0.2973	0.276	0.2576	0.2531	0.233	0.2362	0.2271	0.0912	0.0901	0.0883	0.0776	0.076	0.0764
310	0.0741	0.0735	0.0742	0.2787	0.2727	0.323	0.286	0.2703	0.2699	0.2465	0.2419	0.2392	0.093	0.0925	0.0905	0.0777	0.0761	0.0766
320	0.0739	0.0736	0.0743	0.29	0.2847	0.3661	0.2996	0.2806	0.2801	0.2469	0.2458	0.2468	0.0943	0.0938	0.0919	0.078	0.0763	0.0768
330	0.0739	0.0735	0.0741	0.3079	0.3061	0.3946	0.3184	0.2911	0.2901	0.2518	0.2472	0.2477	0.0943	0.0939	0.0921	0.0784	0.0767	0.0772
340	0.0738	0.0736	0.0743	0.3255	0.3292	0.41	0.3352	0.3056	0.3049	0.2483	0.2434	0.2409	0.0924	0.0928	0.0913	0.0788	0.0769	0.0774
350	0.0739	0.0734	0.0741	0.3569	0.3595	0.4228	0.3531	0.3193	0.3218	0.2405	0.2392	0.2384	0.0908	0.0913	0.0903	0.0793	0.0774	0.0778
360	0.0739	0.0735	0.0742	0.3876	0.3902	0.4388	0.3694	0.3396	0.3429	0.2381	0.2352	0.2353	0.0888	0.0897	0.0892	0.0798	0.078	0.0783
370	0.0739	0.0734	0.0741	0.4056	0.4194	0.4566	0.3798	0.3559	0.3599	0.234	0.2291	0.2319	0.0876	0.0882	0.0881	0.0808	0.0789	0.0792
380	0.0739	0.0734	0.074	0.4276	0.4374	0.475	0.3884	0.3699	0.3766	0.2314	0.2241	0.2317	0.0871	0.0876	0.0873	0.0821	0.08	0.0802
390	0.0739	0.0736	0.0743	0.4438	0.4502	0.4967	0.3937	0.38	0.3899	0.2273	0.2263	0.2305	0.0872	0.0878	0.0875	0.0833	0.0812	0.0813
400	0.074	0.0736	0.0743	0.4614	0.4613	0.5279	0.3989	0.3907	0.3979	0.2219	0.2269	0.2269	0.0879	0.0884	0.0883	0.0852	0.0828	0.083
410	0.0739	0.0737	0.0742	0.4769	0.4736	0.5488	0.4008	0.3973	0.4024	0.22	0.2268	0.2263	0.0896	0.0898	0.0896	0.0874	0.0847	0.085
420	0.0741	0.0735	0.0742	0.4967	0.4837	0.5674	0.4021	0.4014	0.4044	0.224	0.2291	0.2298	0.0924	0.0921	0.0917	0.0904	0.0876	0.0878
430	0.074	0.0735	0.0742	0.5112	0.4936	0.5854	0.4013	0.4024	0.4075	0.2294	0.2331	0.235	0.0962	0.0954	0.0947	0.0944	0.0912	0.0913
440	0.074	0.0736	0.0742	0.5291	0.5023	0.602	0.4011	0.4003	0.4073	0.2349	0.2394	0.2409	0.1025	0.101	0.0992	0.1002	0.0964	0.0965
450	0.0741	0.0734	0.0743	0.5448	0.5114	0.6179	0.4018	0.3973	0.4067	0.2408	0.245	0.2464	0.1118	0.1097	0.1061	0.1091	0.1046	0.1043
460	0.0739	0.0735	0.0742	0.5581	0.5198	0.6344	0.4021	0.3945	0.4062	0.2468	0.25	0.2516	0.1225	0.1207	0.1173	0.1222	0.1157	0.1158
470	0.074	0.0735	0.0741	0.5711	0.528	0.652	0.4032	0.391	0.404	0.2521	0.2554	0.256	0.1372	0.1333	0.13	0.1355	0.1269	0.1276
480	0.0739	0.0734	0.0742	0.585	0.5367	0.668	0.4027	0.3889	0.4032	0.2557	0.2598	0.2596	0.156	0.1512	0.1449	0.1509	0.1417	0.1431
490	0.0741	0.0736	0.0742	0.5975	0.5444	0.6833	0.4025	0.3862	0.4017	0.2581	0.2633	0.2613	0.1776	0.172	0.1625	0.1677	0.1569	0.1586
500	0.0741	0.0736	0.0743	0.6073	0.5527	0.6988	0.4005	0.3838	0.4011	0.2609	0.2666	0.2643	0.2046	0.1921	0.1835	0.1861	0.1738	0.1764
510	0.0741	0.0736	0.0743	0.6181	0.5683	0.7342	0.3993	0.3827	0.4004	0.2639	0.2695	0.2665	0.232	0.2141	0.2273	0.206	0.1917	0.1996
520	0.074	0.0736	0.0742	0.6274	0.579	0.7536	0.3984	0.3809	0.4	0.2671	0.2725	0.2701	0.2535	0.2366	0.243	0.2245	0.2119	0.2102
530	0.074	0.0735	0.0744	0.6351	0.5956	0.7666	0.3999	0.3795	0.3978	0.2678	0.2728	0.2722	0.2493	0.2576	0.2544	0.2365	0.2263	0.2282
540	0.074	0.0738	0.0745	0.6425	0.6037	0.7784	0.3999	0.3783	0.396	0.2694	0.2749	0.2749	0.27	0.2735	0.2613	0.2434	0.2384	0.2375
550	0.074	0.0738	0.0744	0.6513	0.6114	0.7905	0.3994	0.3769	0.3947	0.2727	0.2768	0.2774	0.2952	0.3016	0.2703	0.2472	0.2419	0.2425
560	0.0741	0.0738	0.0744	0.661	0.6183	0.8019	0.4003	0.3768	0.3946	0.276	0.2795	0.2794	0.3098	0.3235	0.292	0.2597	0.2438	0.2471
570	0.074	0.0738	0.0744	0.6705	0.6258	0.8189	0.4002	0.3763	0.3944	0.2786	0.282	0.2814	0.318	0.3348	0.2973	0.2714	0.2488	0.2506
580	0.0741	0.0737	0.0744	0.679	0.6335	0.8333	0.4002	0.3764	0.3948	0.2811	0.2842	0.2848	0.3398	0.3306	0.3114	0.2853	0.258	0.258
590	0.0741	0.0736	0.0743	0.6884	0.6418	0.8458	0.401	0.3762	0.3958	0.2829	0.2866	0.2869	0.3602	0.3539	0.3193	0.2955	0.2711	0.2749
600	0.0741	0.0736	0.0742	0.6973	0.6496	0.8574	0.4005	0.3761	0.3961	0.2855	0.2888	0.2893	0.3757	0.3663	0.338	0.3057	0.2865	0.2856
610	0.0741	0.0735	0.0743	0.7059	0.6576	0.8586	0.4012	0.3767	0.3974	0.2886	0.2922	0.2918	0.3898	0.3834	0.3532	0.3164	0.2969	0.2943
620	0.0743	0.0736	0.0744	0.7141	0.6658	0.8625	0.4005	0.3771	0.3985	0.2903	0.2946	0.2941	0.402	0.398	0.3766	0.3253	0.3071	0.3021
630	0.0741	0.0737	0.0744	0.729	0.6657	0.8608	0.3975	0.3773	0.4002	0.291	0.298	0.2964	0.4093	0.414	0.3801	0.3347	0.3215	0.3157
640	0.0743	0.0737	0.0744	0.741	0.6752	0.8619	0.3977	0.3785	0.4018	0.2931	0.3013	0.2985	0.4204	0.4299	0.394	0.3413	0.3299	0.3254
650	0.0741	0.0737	0.0745	0.7485	0.6823	0.8635	0.3981	0.3796	0.403	0.2939	0.3036	0.3002	0.4311	0.4455	0.4075	0.3465	0.3373	0.3329
660	0.0742	0.0737	0.0743	0.757	0.6947	0.8676	0.3984	0.3805	0.4025	0.296	0.306	0.3025	0.4406	0.4539	0.4255	0.3525	0.3437	0.3385
670	0.074	0.0739	0.0744	0.7607	0.7048	0.873	0.3978	0.381	0.4026	0.2978	0.3078	0.3042	0.4473	0.4641	0.4304	0.3588	0.3494	0.343
680	0.0742	0.0738	0.0744	0.7646	0.7105	0.8772	0.3973	0.3812	0.4023	0.2998	0.3101	0.3066	0.4537	0.4732	0.4352	0.3643	0.3537	0.3464
690	0.0741	0.0738	0.0745	0.7736	0.7178	0.8846	0.397	0.3819	0.4013	0.3025	0.3124	0.3085	0.4591	0.477	0.4395	0.3696	0.3584	0.3502
700	0.0741	0.0737	0.0744	0.781	0.724	0.8903	0.3965	0.3819	0.4015	0.3036	0.3144	0.31	0.4632	0.4822	0.4466	0.376	0.3633	0.3527
710	0.0742	0.0737	0.0745	0.7898	0.7316	0.8982	0.3959	0.3817	0.4007	0.3054	0.3161	0.3114	0.4699	0.4888	0.4508	0.3828	0.3672	0.3554
720	0.0742	0.0738	0.0744	0.7971	0.7409	0.9046	0.3954	0.382	0.4007	0.3071	0.3182	0.3128	0.4754	0.4943	0.4589	0.3886	0.3727	0.3578
730	0.0742	0.0738	0.0744	0.8082	0.7489	0.9233	0.3954	0.3824	0.4003	0.3095	0.319	0.3136	0.4877	0.4954	0.4642	0.3958	0.3773	0.3599
740	0.0742	0.0736	0.0745	0.8072	0.7552	0.9383	0.3952	0.3813	0.3989	0.3114	0.3205	0.3147	0.4935	0.4994	0.4723	0.4013	0.3804	0.3625
750	0.0742	0.0737	0.0744	0.8071	0.77	0.9339	0.3947	0.381	0.3982	0.3116	0.322	0.3158	0.4957	0.5026	0.4775	0.4062	0.3847	0.3654
760	0.0741	0.0737	0.0744	0.8168	0.7814	0.9363	0.3941	0.381	0.3978	0.3117	0.3236	0.3165	0.4975	0.5034	0.4837	0.4125	0.3885	0.3674
770	0.0743	0.0737	0.0745	0.8232	0.7942	0.9396	0.3946	0.3809	0.3976	0.3129	0.3246	0.3169	0.4995	0.5071	0.4888	0.4176	0.3927	0.3696
780	0.0741	0.0738	0.0745	0.8317	0.8023	0.9455	0.3945	0.3809	0.3975	0.3147	0.3258	0.3179	0.5011	0.5084	0.4956	0.422	0.3958	0.3716
790	0.0742	0.0738	0.0745	0.839	0.8099	0.9505	0.3949	0.3814	0.3971	0.3159	0.3262	0.3179	0.5044	0.5106	0.4966	0.4261	0.3988	0.3738
800	0.0741	0.0736	0.0742	0.8492	0.8153	0.9589	0.3949	0.3815	0.3971	0.3174	0.3271	0.3182	0.507	0.5135	0.4977	0.4306	0.4007	0.3753
810	0.0743	0.0738	0.0744	0.8582	0.8198	0.9972	0.3951	0.381	0.3953	0.3181	0.3266	0.3177	0.512	0.5155	0.5013	0.4347	0.4032	0.3807
820	0.0743	0.0737	0.0744	0.863	0.8226	1.0136	0.3953	0.3808	0.3947	0.3184	0.3275	0.3178	0.5137	0.518	0.5036	0.4357	0.4075	0.3844
830	0.0742	0.0739	0.0746	0.8713	0.8277	1.0213	0.395	0.3806	0.3934	0.3183	0.3284	0.318	0.5165	0.5188	0.5044	0.4312	0.4101	0.3883
840	0.0743	0.0738	0.0745	0.8767	0.8316	1.026	0.3954	0.3804	0.3934	0.3181	0.3293	0.3184	0.5186	0.5198	0.507	0.4342	0.4143	0.3918
850	0.0743	0.0738	0.0744	0.8811	0.8361	1.0285	0.3956	0.3802	0.3933	0.3177	0.3303	0.3183	0.5205	0.5212	0.5079	0.4366	0.4186	0.3947
860	0.0741	0.0737	0.0743	0.8864	0.844	1.0318	0.3961	0.3804	0.3932	0.3182	0.3315	0.3185	0.5233	0.5225	0.5087	0.4398	0.4204	0.397
870	0.0741	0.0739	0.0745	0.8922	0.8489	1.0322	0.3974	0.3808	0.3939	0.3185	0.3318	0.3186	0.5258	0.5239	0.5105	0.4416	0.4253	0.4006
880	0.0742	0.0739	0.0745	0.8973	0.8532	1.0325	0.3987	0.3809	0.3947	0.3192	0.3324	0.3193	0.5271	0.5248	0.5101	0.4457	0.4316	0.4042
890	0.0742	0.0737	0.0744	0.8998	0.8559	1.0352	0.4007	0.3813	0.396	0.3198	0.3336	0.3202	0.5287	0.5269	0.5131	0.4473	0.4355	0.4061
900	0.074	0.0738	0.0744	0.903	0.8597	1.0357	0.4021	0.3814	0.3965	0.3209	0.3349	0.3214	0.5306	0.5269	0.5164	0.4488	0.4392	0.409
910	0.0743	0.0737	0.0743	0.9074	0.8623	1.0363	0.403	0.3815	0.3977	0.3225	0.3357	0.3227	0.5316	0.528	0.5175	0.4496	0.4424	0.4109
920	0.0742	0.0738	0.0744	0.9121	0.8662	1.0379	0.4031	0.3831	0.3989	0.3232	0.336	0.3241	0.5318	0.5293	0.5201	0.452	0.4436	0.4122
930	0.074	0.0737	0.0744	0.9172	0.8683	1.0392	0.4037	0.3833	0.3997	0.3248	0.337	0.325	0.5315	0.5309	0.5214	0.4538	0.4466	0.413
940	0.0742	0.0738	0.0744	0.9229	0.8731	1.0399	0.4041	0.3849	0.4007	0.3259	0.3383	0.3267	0.5339	0.5313	0.5235	0.4571	0.4469	0.4123
950	0.0742	0.0737	0.0744	0.9281	0.8865	1.0399	0.4061	0.3869	0.3993	0.3248	0.3364	0.3272	0.5338	0.5308	0.5202	0.4537	0.4451	0.4134
960	0.0741	0.0737	0.0744	0.9305	0.8899	1.0381	0.4052	0.3889	0.3999	0.3247	0.3363	0.3291	0.5321	0.5288	0.5206	0.4507	0.4443	0.4151
970	0.0741	0.0738	0.0745	0.9326	0.8937	1.0371	0.4029	0.3895	0.4021	0.3252	0.3367	0.3317	0.53	0.5279	0.5203	0.45	0.4426	0.4174
980	0.0741	0.0739	0.0744	0.9344	0.8989	1.0364	0.4015	0.3896	0.4049	0.3261	0.3372	0.335	0.5287	0.5262	0.5192	0.4489	0.4425	0.4181
990	0.074	0.0736	0.0744	0.9362	0.905	1.0364	0.4003	0.3894	0.4094	0.3268	0.3385	0.3371	0.5276	0.523	0.5177	0.4461	0.4429	0.4182
1000	0.0739	0.0737	0.0744	0.9411	0.9118	1.0359	0.4003	0.3888	0.4133	0.3281	0.34	0.3384	0.5276	0.5227	0.5185	0.4448	0.4437	0.4196
1010	0.0741	0.0736	0.0745	0.9366	0.9174	1.0329	0.4008	0.3888	0.4155	0.3297	0.3427	0.3399	0.5272	0.5199	0.5185	0.443	0.4446	0.4212
1020	0.0741	0.0738	0.0744	0.9351	0.9161	1.0228	0.4025	0.3908	0.4187	0.3335	0.3475	0.3421	0.5284	0.5258	0.5199	0.4545	0.4499	0.436
1030	0.0739	0.0736	0.0743	0.9484	0.9192	1.0346	0.4047	0.3914	0.4203	0.3381	0.3506	0.3439	0.5295	0.526	0.519	0.4532	0.4507	0.4284
1040	0.0741	0.0738	0.0744	0.9495	0.9173	1.0358	0.4067	0.3919	0.4212	0.3432	0.3547	0.3452	0.53	0.5257	0.5227	0.4529	0.453	0.4292
1050	0.0741	0.0738	0.0745	0.9514	0.9183	1.0366	0.4077	0.3917	0.4215	0.3461	0.3593	0.3464	0.5294	0.5249	0.5235	0.4529	0.4545	0.431
1060	0.0741	0.0737	0.0743	0.9556	0.919	1.0382	0.4082	0.3922	0.4219	0.3484	0.3618	0.3474	0.5291	0.5258	0.5241	0.4527	0.4556	0.4322
1070	0.0741	0.0737	0.0744	0.975	0.9192	1.0385	0.4087	0.3921	0.4223	0.3505	0.3641	0.3479	0.5293	0.5272	0.5248	0.4531	0.4565	0.4295
1080	0.0742	0.0739	0.0746	0.981	0.9219	1.0379	0.4083	0.3918	0.422	0.3521	0.3656	0.3487	0.5284	0.5279	0.5251	0.4527	0.4572	0.429
1090	0.0742	0.0738	0.0745	0.9808	0.9265	1.0302	0.4082	0.3919	0.4233	0.3529	0.3676	0.3502	0.5295	0.5309	0.5273	0.4537	0.4598	0.437
1100	0.0741	0.0739	0.0745	0.9791	0.9331	1.0343	0.4079	0.3927	0.4242	0.3554	0.3695	0.3514	0.5295	0.5318	0.5281	0.4523	0.4588	0.4401
1110	0.0741	0.0738	0.0745	0.9833	0.9349	1.0457	0.4077	0.393	0.4241	0.3577	0.3703	0.3514	0.5297	0.5289	0.5288	0.4497	0.4568	0.4359
1120	0.0741	0.0738	0.0744	0.9824	0.9409	1.0429	0.4072	0.3927	0.4241	0.3584	0.3713	0.3519	0.528	0.5255	0.5281	0.4494	0.4551	0.4349
1130	0.0741	0.0738	0.0745	0.9793	0.9455	1.0475	0.4065	0.3931	0.4244	0.3592	0.3727	0.3532	0.5301	0.5286	0.5291	0.453	0.4594	0.4416
1140	0.074	0.0737	0.0743	0.9814	0.951	1.0476	0.4063	0.3925	0.4243	0.3609	0.3736	0.3539	0.5326	0.5294	0.5281	0.4571	0.4619	0.4445
1150	0.0741	0.0737	0.0744	0.9845	0.9555	1.0495	0.4066	0.3926	0.4239	0.3619	0.3744	0.3541	0.5348	0.5295	0.5269	0.4597	0.4639	0.4474
1160	0.0742	0.0737	0.0744	0.9881	0.9608	1.0505	0.4066	0.3924	0.424	0.3632	0.3752	0.355	0.5354	0.5293	0.5277	0.4604	0.4633	0.4494
1170	0.0741	0.0738	0.0745	0.9927	0.9649	1.0505	0.4066	0.3921	0.4237	0.3641	0.3756	0.3556	0.5372	0.5291	0.528	0.4629	0.4634	0.451
1180	0.0742	0.0739	0.0746	0.9951	0.9684	1.0513	0.4069	0.3924	0.4236	0.3651	0.3763	0.3562	0.5389	0.5286	0.5299	0.4638	0.4634	0.4524
1190	0.074	0.0739	0.0744	0.9959	0.9742	1.0516	0.4065	0.3928	0.4235	0.3662	0.3771	0.3578	0.5385	0.5287	0.5303	0.465	0.4627	0.4543
1200	0.0742	0.0739	0.0744	0.9999	0.9793	1.0516	0.4065	0.393	0.4237	0.3675	0.3781	0.3592	0.5399	0.5304	0.5308	0.4672	0.4633	0.4553
1210	0.0742	0.0736	0.0744	1.0075	0.9848	1.0513	0.4066	0.3941	0.424	0.3685	0.3789	0.3596	0.5385	0.5303	0.5317	0.4682	0.4629	0.4567
1220	0.0742	0.0737	0.0745	1.0086	0.9899	1.0503	0.4067	0.3941	0.4243	0.3692	0.3804	0.361	0.5383	0.5319	0.5311	0.4707	0.4632	0.4581
1230	0.0741	0.0739	0.0746	1.0109	0.9958	1.0499	0.4072	0.3941	0.4246	0.3699	0.3815	0.3619	0.5393	0.5349	0.5319	0.4711	0.4629	0.4595
1240	0.0748	0.074	0.0751	1.006	1.0231	1.0394	0.4135	0.4021	0.4323	0.3737	0.3839	0.3643	0.5481	0.5462	0.543	0.4824	0.4705	0.4698
1250	0.0748	0.0741	0.0751	1.002	1.0277	1.04	0.4149	0.402	0.4324	0.3753	0.3849	0.3651	0.5502	0.5485	0.5445	0.4793	0.4695	0.472
1260	0.0748	0.0741	0.075	1.0033	1.0314	1.0457	0.4163	0.4016	0.4331	0.377	0.3864	0.3663	0.5512	0.5504	0.5445	0.4776	0.4684	0.4713
1270	0.0749	0.074	0.075	0.9973	1.0379	1.0405	0.4168	0.4014	0.4335	0.378	0.3876	0.3657	0.5511	0.5521	0.5456	0.4782	0.4681	0.4742
1280	0.0749	0.074	0.075	0.9951	1.0413	1.0404	0.4175	0.4014	0.4339	0.3796	0.3885	0.3666	0.5514	0.5537	0.5499	0.4758	0.4652	0.4724
1290	0.0749	0.074	0.0751	0.994	1.0448	1.0417	0.4187	0.401	0.4348	0.381	0.3894	0.3673	0.5515	0.5556	0.5528	0.4759	0.4671	0.4724
1300	0.0749	0.0742	0.0752	0.9938	1.0463	1.043	0.4192	0.4014	0.4356	0.3821	0.3896	0.3684	0.5524	0.5562	0.5569	0.4762	0.4666	0.472
1310	0.075	0.0741	0.0751	0.9939	1.0486	1.0433	0.4204	0.4017	0.4362	0.3837	0.3901	0.3693	0.5534	0.5565	0.5589	0.476	0.467	0.4704
1320	0.075	0.0739	0.075	0.9946	1.0506	1.0454	0.421	0.4019	0.4364	0.3848	0.391	0.371	0.5539	0.5574	0.5614	0.4768	0.4659	0.4682
1330	0.075	0.0739	0.0752	0.9947	1.0513	1.0447	0.4212	0.4028	0.437	0.3857	0.3911	0.3713	0.5547	0.5586	0.5615	0.4773	0.4679	0.4686
1340	0.0748	0.0741	0.075	0.994	1.0523	1.0456	0.4212	0.4034	0.4371	0.3865	0.3922	0.3727	0.5556	0.5603	0.5627	0.4762	0.468	0.467
1350	0.0749	0.0739	0.0749	0.9942	1.0539	1.0458	0.4215	0.404	0.4375	0.3876	0.3929	0.373	0.5565	0.5631	0.564	0.4757	0.4688	0.4657
1360	0.0749	0.074	0.0751	0.9956	1.0552	1.0473	0.4223	0.4043	0.4377	0.3876	0.3939	0.3742	0.5577	0.5649	0.5655	0.4753	0.4693	0.4651
1370	0.0748	0.074	0.0753	0.9967	1.0557	1.0493	0.4221	0.4055	0.4386	0.3879	0.395	0.375	0.5605	0.5667	0.5663	0.4755	0.4702	0.4657
1380	0.0748	0.074	0.0751	0.9959	1.056	1.0487	0.4225	0.4062	0.4388	0.3882	0.3962	0.377	0.5608	0.5676	0.5661	0.475	0.4706	0.4643
1390	0.0748	0.074	0.0751	0.995	1.0567	1.0496	0.4226	0.4066	0.4394	0.3886	0.397	0.3787	0.5625	0.5682	0.5667	0.4743	0.4714	0.4639
1400	0.075	0.0739	0.0751	0.9967	1.0568	1.0496	0.4233	0.4074	0.4404	0.3884	0.3978	0.38	0.563	0.5689	0.5678	0.4739	0.472	0.463
1410	0.0749	0.074	0.0752	0.9984	1.0578	1.0517	0.4232	0.4083	0.4403	0.3885	0.3984	0.3811	0.5639	0.5692	0.569	0.4732	0.4729	0.4637
1420	0.0749	0.0742	0.0752	0.9964	1.0577	1.0486	0.4238	0.4086	0.4409	0.3882	0.3988	0.3827	0.5646	0.5702	0.5687	0.4727	0.4721	0.4631
1430	0.075	0.074	0.075	0.9979	1.0581	1.051	0.4246	0.4096	0.4415	0.3882	0.3996	0.3853	0.5656	0.5706	0.5691	0.4731	0.4736	0.4634
1440	0.0749	0.074	0.0752	0.9973	1.0588	1.0501	0.4251	0.4104	0.4419	0.3894	0.4011	0.3879	0.5662	0.5711	0.569	0.4731	0.4743	0.4644
1450	0.0749	0.074	0.0751	0.9986	1.0602	1.0512	0.4259	0.4117	0.4429	0.3904	0.4022	0.3913	0.5656	0.5718	0.5687	0.4733	0.4743	0.4647
1460	0.0749	0.0741	0.0752	0.9989	1.0613	1.0509	0.4261	0.4129	0.4435	0.3915	0.4029	0.3934	0.5672	0.5717	0.5693	0.4741	0.4758	0.4661
1470	0.075	0.074	0.075	0.9987	1.0621	1.0507	0.4272	0.4139	0.444	0.3929	0.4037	0.396	0.5677	0.5716	0.5687	0.4742	0.4762	0.4667
1480	0.0749	0.0739	0.075	0.9996	1.0627	1.0515	0.4273	0.4148	0.4447	0.3937	0.4038	0.3975	0.5684	0.5712	0.5692	0.4744	0.4768	0.4667
1490	0.0749	0.074	0.0751	1.0003	1.0637	1.0517	0.4284	0.4159	0.4456	0.3947	0.4045	0.3986	0.5689	0.571	0.5692	0.4749	0.4772	0.4672
1500	0.0749	0.0741	0.0752	1.0015	1.0648	1.0523	0.4295	0.4165	0.4463	0.3961	0.4058	0.3998	0.5695	0.5713	0.5697	0.4749	0.4773	0.467
1510	0.0749	0.0742	0.0753	1.0028	1.0653	1.0532	0.4307	0.4177	0.4472	0.3978	0.4066	0.4011	0.571	0.5724	0.5698	0.4757	0.4791	0.4684
1520	0.0749	0.0741	0.0751	1.0032	1.0667	1.0535	0.4313	0.419	0.448	0.399	0.4075	0.402	0.5716	0.5724	0.5699	0.4758	0.4793	0.4687
1530	0.0749	0.074	0.0751	1.0036	1.0681	1.0538	0.4327	0.4201	0.4486	0.4003	0.4094	0.4034	0.5725	0.5723	0.5701	0.4767	0.4801	0.4686
1540	0.0751	0.074	0.0752	1.0047	1.0684	1.0545	0.4334	0.4211	0.4493	0.4015	0.4107	0.4043	0.5735	0.5728	0.5706	0.4774	0.4803	0.4696
1550	0.075	0.0741	0.0752	1.0054	1.0697	1.0547	0.4349	0.4222	0.4503	0.4027	0.4128	0.4062	0.5733	0.5729	0.5705	0.478	0.4804	0.4699
1560	0.0749	0.0741	0.0751	1.0053	1.0704	1.0539	0.4362	0.4234	0.4511	0.4044	0.4145	0.4073	0.5739	0.5727	0.5703	0.4783	0.4814	0.4699
1570	0.075	0.0742	0.0754	1.0072	1.0727	1.0554	0.4374	0.4247	0.4519	0.4053	0.4168	0.4083	0.5748	0.573	0.5711	0.479	0.4814	0.4709
1580	0.075	0.0742	0.0752	1.0069	1.0732	1.0551	0.4387	0.4256	0.4528	0.4061	0.4183	0.4092	0.5748	0.5724	0.5712	0.4798	0.4819	0.4714
1590	0.0749	0.0742	0.0753	1.0079	1.0737	1.0563	0.4402	0.4272	0.4536	0.4074	0.4203	0.4104	0.5753	0.5724	0.5719	0.4806	0.4824	0.4716
1600	0.0749	0.074	0.075	1.0086	1.0753	1.0564	0.4409	0.4278	0.4542	0.4082	0.4223	0.4119	0.5761	0.5728	0.5711	0.4804	0.4824	0.4713
1610	0.075	0.0741	0.0753	1.0097	1.0765	1.058	0.4419	0.4286	0.4554	0.4097	0.424	0.4126	0.5761	0.5737	0.5723	0.481	0.4836	0.4722
1620	0.075	0.0741	0.0752	1.0094	1.0771	1.0561	0.4424	0.4298	0.456	0.4107	0.4259	0.4136	0.576	0.5737	0.5722	0.4815	0.4844	0.4729
1630	0.075	0.0742	0.0753	1.011	1.0782	1.0582	0.4439	0.4308	0.4569	0.4117	0.4274	0.4147	0.5765	0.5751	0.5736	0.4825	0.4849	0.4734
1640	0.0752	0.0741	0.0753	1.0127	1.0793	1.0592	0.4448	0.4323	0.4574	0.413	0.429	0.4158	0.5768	0.5741	0.573	0.4828	0.4848	0.4738
1650	0.0751	0.0742	0.0752	1.0126	1.0798	1.0585	0.4457	0.433	0.458	0.4136	0.4301	0.4169	0.5774	0.5729	0.5727	0.4836	0.4857	0.4747
1660	0.0751	0.0742	0.0752	1.013	1.0807	1.0597	0.4465	0.4335	0.4586	0.4147	0.4315	0.4186	0.5768	0.5707	0.5726	0.4828	0.4849	0.4742
1670	0.0749	0.074	0.0752	1.014	1.0815	1.06	0.4479	0.435	0.4596	0.4158	0.4329	0.4198	0.5769	0.5704	0.5724	0.4826	0.4843	0.4736
1680	0.075	0.0741	0.0753	1.0144	1.0833	1.0598	0.4489	0.4357	0.4604	0.4169	0.4345	0.4209	0.578	0.5702	0.572	0.4834	0.4857	0.4755
1690	0.075	0.0741	0.0752	1.0151	1.0841	1.0601	0.4498	0.4366	0.4617	0.418	0.4363	0.4219	0.5784	0.5697	0.5722	0.4842	0.4858	0.4759
1700	0.0752	0.0741	0.0751	1.0165	1.0844	1.0615	0.4509	0.4375	0.4622	0.4185	0.4378	0.4227	0.5785	0.5699	0.5716	0.4843	0.4855	0.4767
1710	0.0751	0.0741	0.0753	1.0193	1.0855	1.0633	0.4516	0.4382	0.4633	0.4203	0.4396	0.4239	0.5793	0.57	0.5722	0.4848	0.4861	0.4778
1720	0.0752	0.0742	0.0753	1.0194	1.0865	1.0619	0.4519	0.4387	0.4644	0.421	0.4408	0.4248	0.5805	0.57	0.5718	0.4862	0.4863	0.4785
1730	0.0751	0.0742	0.0752	1.0206	1.0874	1.0625	0.4534	0.4394	0.4658	0.4223	0.4418	0.426	0.5812	0.5697	0.5727	0.4871	0.4868	0.4786
1740	0.0751	0.0741	0.0752	1.0209	1.0879	1.0618	0.4542	0.4405	0.4664	0.4233	0.4427	0.427	0.5813	0.5697	0.5734	0.4878	0.4867	0.4789
1750	0.0751	0.0743	0.0754	1.0213	1.0882	1.0622	0.4558	0.441	0.4673	0.4251	0.444	0.4281	0.5819	0.5699	0.5727	0.4882	0.4864	0.4791
1760	0.0751	0.0742	0.0753	1.0224	1.089	1.0635	0.4571	0.4422	0.4685	0.4264	0.4449	0.4297	0.5824	0.5701	0.5733	0.4877	0.4861	0.4794
1770	0.0751	0.0742	0.0753	1.0231	1.0902	1.0641	0.4583	0.4435	0.4696	0.4279	0.4462	0.4311	0.5842	0.5715	0.5733	0.4902	0.4879	0.4812
1780	0.0751	0.0741	0.0752	1.0221	1.0908	1.0627	0.4592	0.4441	0.4707	0.429	0.4476	0.4311	0.5838	0.5712	0.5735	0.4901	0.4868	0.4806
1790	0.075	0.0742	0.0754	1.0249	1.0912	1.0641	0.4604	0.4448	0.4719	0.431	0.4486	0.4331	0.5848	0.5722	0.5743	0.4907	0.488	0.4819
1800	0.0752	0.0742	0.0754	1.0233	1.0925	1.0626	0.4614	0.4443	0.4728	0.4327	0.4499	0.4337	0.5851	0.572	0.5735	0.4911	0.487	0.4811
1810	0.0751	0.0741	0.0752	1.0252	1.0928	1.0639	0.4622	0.4464	0.4737	0.4338	0.4514	0.4346	0.5861	0.5739	0.5735	0.4915	0.4859	0.4825
1820	0.0751	0.0742	0.0753	1.0267	1.0937	1.0652	0.4629	0.4475	0.4751	0.4356	0.4529	0.4361	0.5877	0.574	0.574	0.4923	0.487	0.4833
1830	0.0751	0.0741	0.0752	1.027	1.0953	1.0636	0.4635	0.4477	0.4755	0.4371	0.4538	0.4369	0.5882	0.5729	0.5744	0.4944	0.4887	0.4858
1840	0.0752	0.0741	0.0753	1.0274	1.0953	1.0641	0.4647	0.4487	0.477	0.4383	0.4552	0.4382	0.5893	0.5746	0.5748	0.4949	0.4897	0.4866
1850	0.0751	0.0741	0.0751	1.0281	1.0954	1.0648	0.4656	0.4489	0.4774	0.4397	0.4564	0.4392	0.5889	0.5743	0.5744	0.4945	0.4897	0.487
1860	0.075	0.0741	0.0752	1.0289	1.0956	1.065	0.4661	0.45	0.4783	0.4414	0.4582	0.4401	0.5896	0.5745	0.5736	0.4949	0.4897	0.4879
1870	0.0751	0.0741	0.0753	1.0288	1.0964	1.0648	0.4668	0.4504	0.4794	0.4423	0.4592	0.4415	0.5899	0.5746	0.5739	0.4954	0.4899	0.4886
1880	0.0751	0.0742	0.0752	1.028	1.0964	1.0641	0.4673	0.4507	0.4805	0.444	0.4608	0.4421	0.59	0.5751	0.574	0.4959	0.4903	0.4884
1890	0.075	0.0742	0.0752	1.03	1.0979	1.0655	0.4676	0.4517	0.4818	0.4455	0.4625	0.4434	0.5912	0.5763	0.5747	0.4974	0.491	0.4905
1900	0.0751	0.0741	0.0752	1.0303	1.0976	1.0655	0.4685	0.4524	0.4826	0.4462	0.4637	0.4446	0.5917	0.5765	0.575	0.4979	0.4908	0.491
1910	0.0751	0.0743	0.0753	1.0314	1.0985	1.0653	0.4692	0.4527	0.4833	0.4478	0.4645	0.4452	0.5929	0.5771	0.5748	0.4981	0.492	0.4913
1920	0.0751	0.0741	0.0752	1.0316	1.0988	1.066	0.4701	0.4531	0.4836	0.4485	0.4656	0.4465	0.5927	0.5775	0.5749	0.4981	0.4915	0.491
1930	0.0751	0.0742	0.0753	1.0328	1.0989	1.0662	0.4707	0.4539	0.4845	0.4495	0.4667	0.4475	0.5939	0.5779	0.5753	0.4997	0.4926	0.4926
1940	0.0751	0.0741	0.0751	1.0334	1.1	1.0664	0.4718	0.4546	0.4848	0.4507	0.4679	0.4483	0.5941	0.5788	0.5756	0.4996	0.4923	0.4926
1950	0.075	0.0741	0.0752	1.0344	1.101	1.0662	0.4726	0.4549	0.4855	0.4519	0.4695	0.4491	0.5946	0.5788	0.5759	0.5004	0.4931	0.4942
1960	0.0752	0.0742	0.0753	1.0342	1.1013	1.0663	0.4735	0.4551	0.4864	0.4531	0.47	0.4504	0.5956	0.5784	0.5751	0.5015	0.494	0.4948
1970	0.0751	0.0741	0.0752	1.0347	1.1013	1.0667	0.474	0.4561	0.4873	0.4541	0.4715	0.4509	0.596	0.5796	0.5759	0.5013	0.494	0.4943
1980	0.0751	0.0742	0.0753	1.0344	1.102	1.0672	0.4743	0.4561	0.4874	0.4553	0.4724	0.4517	0.5963	0.5791	0.5754	0.5017	0.4948	0.4945
1990	0.0751	0.0742	0.0753	1.0356	1.1019	1.0666	0.4747	0.4568	0.4884	0.4563	0.4735	0.4516	0.5967	0.5795	0.5759	0.5015	0.4936	0.4947
2000	0.075	0.0742	0.0755	1.0356	1.1028	1.0678	0.4751	0.4572	0.4892	0.4575	0.4746	0.4517	0.597	0.5805	0.576	0.5021	0.4937	0.4953
2010	0.0749	0.0741	0.0752	1.0367	1.1033	1.0677	0.4758	0.4588	0.4899	0.4587	0.4757	0.4531	0.5983	0.5811	0.5771	0.5029	0.4946	0.4962
2020	0.075	0.0741	0.0752	1.035	1.1039	1.0665	0.4762	0.4587	0.49	0.4599	0.4762	0.4537	0.5986	0.5805	0.5761	0.5031	0.4945	0.4971
2030	0.0749	0.0741	0.0753	1.0363	1.1043	1.0668	0.4769	0.4588	0.491	0.4608	0.4774	0.4543	0.5992	0.5819	0.5766	0.5032	0.4949	0.4972
2040	0.0751	0.0741	0.0752	1.037	1.1051	1.0674	0.4772	0.4588	0.4917	0.4618	0.4786	0.4546	0.6001	0.582	0.5759	0.5043	0.4962	0.4986
2050	0.0751	0.0741	0.0753	1.0376	1.1056	1.0673	0.4781	0.4591	0.4922	0.4628	0.4792	0.4558	0.6009	0.5826	0.5764	0.5049	0.4972	0.4987
2060	0.0752	0.0741	0.0753	1.0382	1.1062	1.0682	0.4783	0.4588	0.4928	0.4639	0.48	0.4565	0.6014	0.5831	0.5763	0.5049	0.4966	0.4992
2070	0.0751	0.0741	0.0752	1.0372	1.1071	1.0679	0.4784	0.4592	0.4931	0.465	0.4804	0.4564	0.6018	0.5835	0.5761	0.5051	0.4969	0.4996
2080	0.0752	0.0742	0.0754	1.0391	1.1067	1.0676	0.4788	0.4593	0.4936	0.4654	0.4819	0.4572	0.6028	0.5845	0.577	0.5055	0.4985	0.5004
2090	0.075	0.0742	0.0753	1.0388	1.1072	1.0675	0.4793	0.4594	0.4943	0.4664	0.482	0.4572	0.6035	0.5844	0.5768	0.5062	0.4986	0.5003
2100	0.075	0.0742	0.0753	1.0368	1.1063	1.0642	0.4787	0.4596	0.4947	0.4673	0.4833	0.4581	0.6033	0.5839	0.5761	0.5055	0.4976	0.4989
2110	0.075	0.074	0.0754	1.04	1.1089	1.0664	0.4805	0.4614	0.4972	0.4697	0.4847	0.4595	0.6047	0.5866	0.5769	0.5071	0.4951	0.5005
2120	0.0749	0.0744	0.0754	1.0356	1.1087	1.0642	0.4801	0.4611	0.4968	0.4706	0.4849	0.4595	0.6042	0.5864	0.5756	0.5062	0.4931	0.4997
2130	0.0752	0.0741	0.0754	1.0394	1.1089	1.0685	0.4804	0.4612	0.4977	0.4718	0.4855	0.4598	0.6065	0.5877	0.5774	0.5067	0.4956	0.501
2140	0.0751	0.0741	0.0752	1.0411	1.1091	1.0688	0.4808	0.4615	0.4984	0.4728	0.4862	0.4601	0.607	0.5899	0.5777	0.5067	0.495	0.5005
2150	0.0751	0.0742	0.0753	1.0417	1.1107	1.0687	0.4807	0.4614	0.4986	0.4738	0.4865	0.4604	0.6069	0.5911	0.5771	0.5071	0.4966	0.5015
2160	0.075	0.0741	0.0753	1.0406	1.1106	1.0684	0.4809	0.4612	0.4991	0.474	0.4872	0.4608	0.6071	0.5915	0.5772	0.5074	0.496	0.5016
2170	0.075	0.0742	0.0753	1.041	1.1101	1.0683	0.4811	0.4614	0.4999	0.4746	0.4874	0.4614	0.6078	0.5918	0.5775	0.508	0.4959	0.5026
2180	0.0751	0.0741	0.0751	1.0424	1.1104	1.07	0.4805	0.4615	0.5002	0.4755	0.4878	0.4621	0.6085	0.5924	0.578	0.5083	0.4968	0.5031
2190	0.075	0.0742	0.0754	1.0439	1.1117	1.0705	0.4812	0.4626	0.5009	0.4761	0.4886	0.4626	0.6091	0.5936	0.5786	0.509	0.4966	0.5034
2200	0.0752	0.0741	0.0751	1.0443	1.1115	1.0708	0.4809	0.462	0.5016	0.4766	0.4888	0.4629	0.6097	0.5944	0.5785	0.5093	0.4972	0.5041
2210	0.0751	0.0741	0.0754	1.0451	1.1128	1.0714	0.4821	0.4629	0.5028	0.4776	0.4892	0.4639	0.6105	0.5952	0.5789	0.5111	0.4957	0.5052
2220	0.075	0.0741	0.0754	1.0437	1.1122	1.0703	0.4819	0.4627	0.5027	0.4776	0.489	0.4633	0.612	0.5949	0.5788	0.5122	0.4979	0.507
2230	0.075	0.0742	0.0751	1.045	1.1118	1.0714	0.4819	0.4629	0.5025	0.4783	0.4894	0.4637	0.6127	0.5947	0.5786	0.5122	0.4994	0.5072
2240	0.0751	0.0742	0.0753	1.0457	1.1122	1.0726	0.4822	0.4624	0.5024	0.4785	0.4897	0.4643	0.6129	0.5945	0.5784	0.5121	0.4999	0.5075
2250	0.075	0.0743	0.0752	1.0466	1.1129	1.0728	0.4832	0.4631	0.503	0.4793	0.4902	0.465	0.6133	0.5956	0.579	0.5128	0.4996	0.5072
2260	0.0751	0.0741	0.0752	1.0504	1.1139	1.0752	0.4835	0.4634	0.5031	0.48	0.4904	0.4657	0.6143	0.5963	0.5786	0.5146	0.5017	0.5101
2270	0.0752	0.0743	0.0755	1.0481	1.1135	1.0745	0.4833	0.4629	0.5019	0.4798	0.4903	0.4654	0.6145	0.5951	0.5781	0.5153	0.5018	0.51
2280	0.075	0.0742	0.0753	1.0486	1.1142	1.0737	0.4834	0.4628	0.5022	0.48	0.4905	0.4666	0.6144	0.5963	0.5781	0.5149	0.5031	0.5102
2290	0.0751	0.074	0.0753	1.0478	1.114	1.073	0.4831	0.4626	0.5022	0.4797	0.4906	0.4664	0.6148	0.5962	0.5775	0.5149	0.504	0.5094
2300	0.0751	0.0741	0.0753	1.0477	1.1132	1.0731	0.4836	0.4626	0.502	0.4801	0.4907	0.4672	0.6155	0.5963	0.5774	0.515	0.5038	0.5099
2310	0.0751	0.0741	0.0753	1.0498	1.114	1.0745	0.4837	0.4629	0.5022	0.4801	0.4911	0.4676	0.6158	0.5971	0.5778	0.5155	0.5041	0.5104
2320	0.0751	0.0741	0.0753	1.0471	1.1135	1.0714	0.4831	0.4627	0.5026	0.4807	0.4909	0.4672	0.6155	0.5961	0.5773	0.5158	0.5039	0.5107
2330	0.0751	0.0741	0.0754	1.048	1.1144	1.0722	0.4842	0.4639	0.5032	0.481	0.4914	0.4679	0.6165	0.5975	0.5782	0.5163	0.5041	0.5106
2340	0.075	0.0741	0.0753	1.0464	1.1136	1.0701	0.4832	0.4636	0.5021	0.4806	0.4906	0.4677	0.6166	0.5961	0.5772	0.5161	0.5038	0.5109
2350	0.075	0.0742	0.0754	1.0501	1.1147	1.0727	0.4833	0.463	0.5018	0.4811	0.4911	0.468	0.617	0.5957	0.5776	0.5156	0.5043	0.5099
2360	0.075	0.0742	0.0754	1.05	1.1149	1.0722	0.483	0.4632	0.5018	0.4814	0.4911	0.4683	0.6172	0.5957	0.5779	0.5167	0.5048	0.5118
